# Supplementary material for: Nfix Expression Critically Modulates Early B Lymphopoiesis and Myelopoiesis
Source: PubMed Central journal article supplement (PMC4363787; doi:10.1371/journal.pone.0120102), 2015-03-17
Supplement: pone.0120102.s003.pdf [file pone.0120102.s003.pdf]

## **S1 Table**

### **Sorting stem and progenitor populations**

| <b>Population</b>                                                                                | <b>Identification</b>                                                                                                                                                                                                                                                                                                                                                                                                                                                                | <b>Usage</b>                                       | <b>Figure</b>      |
|--------------------------------------------------------------------------------------------------|--------------------------------------------------------------------------------------------------------------------------------------------------------------------------------------------------------------------------------------------------------------------------------------------------------------------------------------------------------------------------------------------------------------------------------------------------------------------------------------|----------------------------------------------------|--------------------|
| hCD25 <sup>-</sup> CLP<br>hCD25 <sup>+</sup> CLP<br>Pro B cells<br>Pre B cells<br>Mature B cells | Lin <sup>-</sup> B220 <sup>-</sup> CD19 <sup>-</sup> IL7R <sup>+</sup> Flt3 <sup>+</sup> Sca1 <sup>low</sup> cKit <sup>low</sup> CD25 <sup>-</sup><br>Lin <sup>-</sup> B220 <sup>-</sup> CD19 <sup>-</sup> IL7R <sup>+</sup> Flt3 <sup>+</sup> Sca1 <sup>low</sup> cKit <sup>low</sup> CD25 <sup>+</sup><br>CD19 <sup>+</sup> AA4.1 <sup>+</sup> CD43 <sup>low</sup><br>CD19 <sup>+</sup> B220 <sup>+</sup> CD43 <sup>-</sup> IgM <sup>-</sup><br>CD19 <sup>+</sup> IgM <sup>+</sup> | Analysis of GSE11110<br>(Mansson et al., 2008)     | Fig 3A             |
| Pre-pro B<br>Pro-B<br>Pre-B<br>Immature B                                                        | B220 <sup>+</sup> CD43 <sup>+</sup> CD19 <sup>-</sup> IgM <sup>-</sup><br>B220 <sup>+</sup> CD43 <sup>+</sup> CD19 <sup>+</sup> AA4 <sup>+</sup> IgM <sup>-</sup><br>CD43 <sup>-</sup> B220 <sup>+</sup> IgM <sup>-</sup> CD19 <sup>+</sup><br>CD43 <sup>-</sup> B220 <sup>+</sup> CD19 <sup>+</sup> IgM <sup>+</sup>                                                                                                                                                                | Cell Sorting                                       | Fig 3B             |
| HSC2<br>Early B-cell<br>Pro-B cells                                                              | CD38 <sup>-</sup> CD34 <sup>+</sup><br>CD34 <sup>+</sup> CD10 <sup>+</sup> CD19 <sup>+</sup><br>CD34 <sup>-</sup> CD10 <sup>+</sup> CD19 <sup>+</sup>                                                                                                                                                                                                                                                                                                                                | Analysis of GSE24759<br>(Novershtern et al., 2011) | Fig 3C             |
| HSC<br>LMPP<br>CMP<br>GMP<br>MEP                                                                 | Lin-cKit+Sca1+Flt3-<br>Lin-cKit+Scat1+Flt3+<br>Lin-cKit+CD34 <sup>int</sup> CD16/32 <sup>int</sup><br>Lin-cKit+CD34+CD16/32+<br>Lin-cKit+CD34-CD16/32-                                                                                                                                                                                                                                                                                                                               | Cell Sorting                                       | Fig 3D<br>Fig 5C-D |
| HSC                                                                                              | Lin-cKit+Sca1+Flt3-                                                                                                                                                                                                                                                                                                                                                                                                                                                                  | Cell Sorting                                       | Fig 4B             |
