# Supplementary material for: Nfix Expression Critically Modulates Early B Lymphopoiesis and Myelopoiesis
Source: PubMed Central journal article supplement (PMC4363787; doi:10.1371/journal.pone.0120102), 2015-03-17
Supplement: pone.0120102.s004.pdf [file pone.0120102.s004.pdf]

## **S2 Table**

### **FACs Antibodies (eBioScience)**

| <b>Marker</b> | <b>Clone</b> |
|---------------|--------------|
| anti-Gr-1     | (RB6-8C5),   |
| anti-CD11b    | M1/70        |
| anti-B220     | RA3-6B2      |
| anti-CD19     | ID3          |
| anti-slgM     | 11/41        |
| anti-CD43     | R2/60        |
| anti-AA4.1    | AA4.1        |
| anti-CD4      | RM4-5        |
| anti-CD8a     | 53-6.7       |
| anti-CD45     | 30-F11       |
| anti-cKit     | 2B8          |
| anti-Sca1     | D7           |
| anti-Flt3     | A2F10        |
| anti-CD34     | RAM34        |
| anti CD16/32  | 93           |
| anti-IL7Ra    | A7R34        |
